# Supplementary material for: Increased Otoferlin Expression in B Cells Is Associated with Muscle Weakness in Untreated Juvenile Dermatomyositis: A Pilot Study
Source: MDPI journal article supplement (doi:10.3390/ijms241310553), 2023-06-23
Supplement: s1 [file s1]

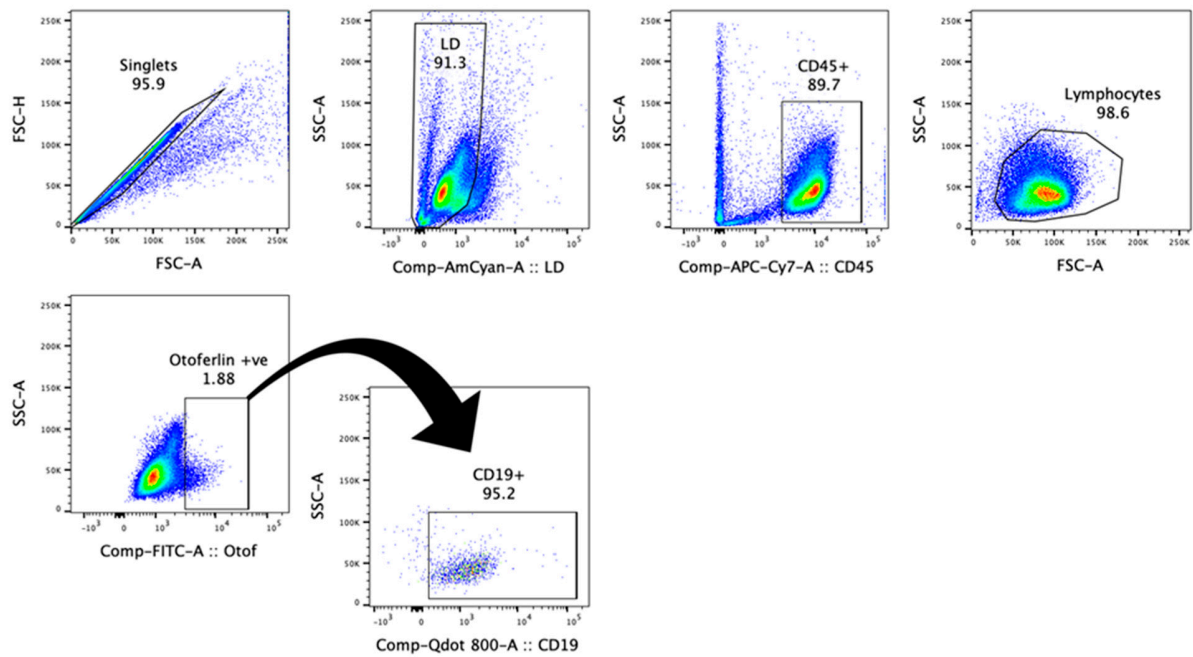

**Figure S1.** The gating strategy for otoferlin expression. The majority of the otoferlin-positive cells were B cells (63% - 99.4%).

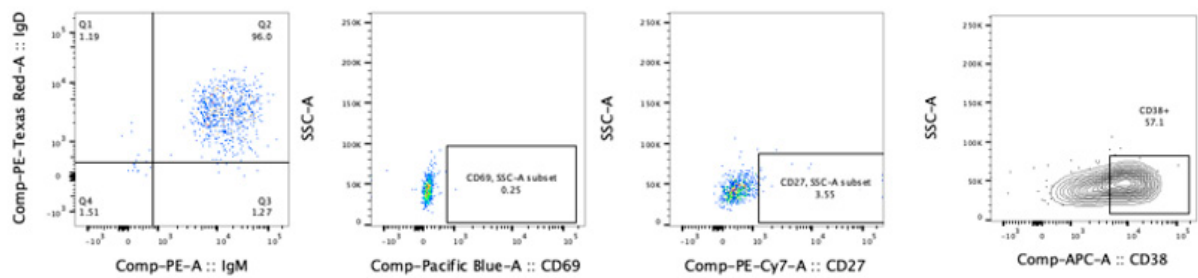

**Figure S2.** The gating strategy for otoferlin expression and B cell subset. Detailed B cell phenotyping showed that these B cells were IgD<sup>+</sup>, IgM<sup>+</sup> CD27<sup>-</sup> naive B cells, with 65-75% of them expressing plasmablast markers (CD19<sup>+</sup>, IgM<sup>+</sup>, CD38<sup>hi</sup>, CD24<sup>+</sup>).

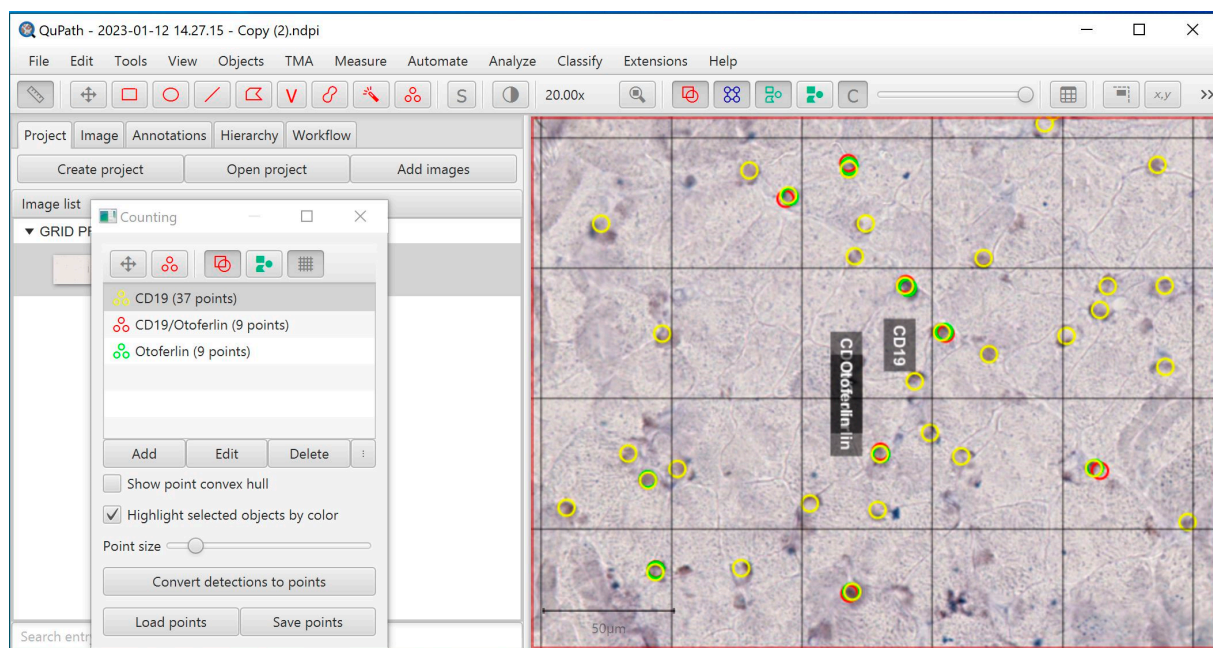

**Figure S3.** Print screen of QuPath (example of scoring CD19 and otoferlin staining). Scalebar 50µm.

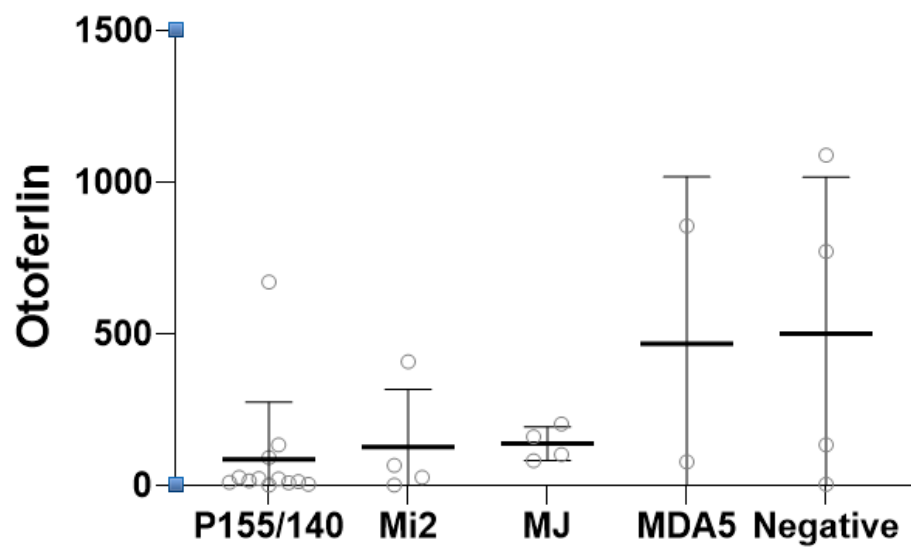

**Figure S4.** Otoferlin expression and MSAs. There was no significant association between the MSAs and otoferlin expression.

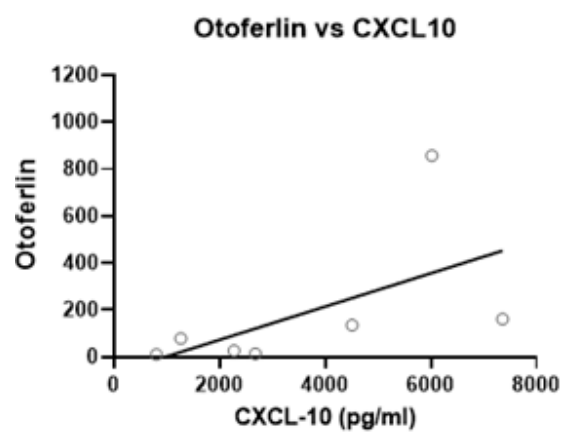

**Figure S5.** Correlation between otoferlin expression and serum CXCL10 (IP-10). There was a positive correlation between CXCL10 and otoferlin expression (Correlation Coefficient 0.8,  $p=0.03$ )
